# Supplementary material for: CD4+T cells in ageing-associated interstitial lung abnormalities show evidence of pro-inflammatory phenotypic and functional profile
Source: PubMed Central journal article supplement — Thorax. 2020 Dec 9;76(2):152–60. doi: 10.1136/thoraxjnl-2020-215520 (PMC7815886; doi:10.1136/thoraxjnl-2020-215520), 2020-12-09
Supplement: thoraxjnl-2020-215520supp001.pdf [file thoraxjnl-2020-215520supp001.pdf]

1 **CD4+T cells in aging-associated interstitial lung abnormalities**  
2 **show evidence of pro-inflammatory phenotypic and functional**  
3 **profile**

4 Carlos Machahua<sup>1†</sup>, Ivette Buendia-Roldan<sup>2†</sup>, Ranferi Ocaña-Guzman<sup>2</sup>,  
5 Maria Molina-Molina<sup>1</sup>, Annie Pardo<sup>3</sup>, Leslie Chavez-Galan<sup>2\*</sup>, Moises  
6 Selman<sup>2</sup>

7 Running title: Pro-inflammatory CD4+ T cells in ILA

8

9 <sup>1</sup>Pneumology Research Group, IDIBELL; L'Hospitalet de Llobregat, Barcelona,  
10 Spain.

11 <sup>2</sup>Instituto Nacional de Enfermedades Respiratorias "Ismael Cosío Villegas",  
12 Mexico City, Mexico.

13 <sup>3</sup>Facultad de Ciencias, Universidad Nacional Autónoma de México.

14 <sup>†</sup>Both authors contributed equally to this manuscript

15 Author's mail: CM ([mach\\_8990@hotmail.com](mailto:mach_8990@hotmail.com)), IBR ([ivettebu@yahoo.com.mx](mailto:ivettebu@yahoo.com.mx)),  
16 ROG ([ranferi.og@gmail.com](mailto:ranferi.og@gmail.com)), MMM ([mariamolinamolina@hotmail.com](mailto:mariamolinamolina@hotmail.com)), AP  
17 ([apardos@unam.mx](mailto:apardos@unam.mx)), LCG ([lchavez\\_galan@iner.gob.mx](mailto:lchavez_galan@iner.gob.mx)), [https://orcid.org/0000-](https://orcid.org/0000-0002-2334-0361)  
18 [0002-2334-0361](https://orcid.org/0002-2334-0361), MS ([mselmanl@yahoo.com.mx](mailto:mselmanl@yahoo.com.mx)).

19

20

21

22

23

24

25

## 26 **Supporting information**

### 27 **Methods**

#### 28 **Study populations**

29 Respiratory asymptomatic volunteers aged 60 or older have been invited to  
30 participate in our “Lung Aging Program”, initiated in Mexico City in March 2015.  
31 From this cohort we studied 15 subjects with diagnosis of Interstitial Lung  
32 Abnormalities based in high resolution computed tomography (HRCT) findings.  
33 Twenty-one age-matched subjects without abnormalities in HRCT and 28 young  
34 individuals (<30 years old) were evaluated as controls. It is important to note that  
35 because of feasibility issues, the number of samples processed for experiments  
36 varied; the number processed by technique is indicated in each figure.

37 All individuals signed a consent letter to participate in this research and procedures  
38 were performed in accordance with the 1964 Helsinki Declaration as well as with  
39 the ethical standards of the Institutional Ethic Committee (protocol numbers: C39-  
40 14 and B16-19).

#### 41 **Multiparametric cytometry analysis**

42 PBMCs were obtained and prepared to flow cytometry analysis. The following  
43 monoclonal antibodies (mAbs) were used: CD3, CD8a, CD4, CD197 (CCR7),  
44 CD45RA, CD57, CD25, CD27, CD28, KLRG1 and CD279 (PD-1), more  
45 information of the specific fluorochrome used is indicated in **figure S1**. PBMCs  
46 were incubated with mAbs for 20 minutes at 4°C, washed and resuspended in  
47 staining buffer (BioLegend, San Jose, CA, USA). Multiparametric flow cytometry  
48 was performed using a FACS Aria II flow cytometer (Becton Dickinson, San Jose,  
49 CA, USA). The side scatter/forward gating strategy was used to exclude dead  
50 cells. Fluorescence minus one (FMO) controls were employed to set the gates for  
51 specific immune cell subpopulations. We acquired at least 100,000 events per

52 sample. Compensation set up and calculation of the frequency of specific cell  
53 subsets were made using Flow Jo (Flow Jo, LLC, Ashland, OR, USA) (**figure S2**).

54 Preparation of peripheral blood mononuclear cells (PBMCs)

55 PBMCs were collected from peripheral blood samples via ficoll density gradient  
56 (Lymphoprep™ Axis-Shield. Oslo, Norway). PBMCs were collected, counted and  
57 preserved in fetal bovine serum with 10% of DMSO and stored in liquid nitrogen  
58 until used. Plasma was stored at -80°C until use.

### 59 **Total T and CD4+ T cells enrichment**

60 Total T cells were isolated from PBMCs by negative selection, using a MACS  
61 system and following the provider instructions (Pan T isolation kit Miltenyi Biotec,  
62 Bergisch Gladbach, Germany). The negative fraction represented the total T cells,  
63 and the efficiency of the enrichment of the total T cells fraction was routinely >90%,  
64 as analysed by flow cytometry. As control, we evaluated the positive fraction (total  
65 T cells depleted and a minimum percentage of CD3+ cells still in this fraction  
66 (**figure S3A and B, respectively**). Total T cells were used to develop the  
67 polyclonal stimulus culture as is indicated below.

68 For other experiments, enriched total T cells were incubated with CD4+ T Cell  
69 Biotin Antibody Cocktail from CD4+ T Cell Isolation kit. We obtained two cellular  
70 fractions, one of enriched CD4+ T cells and a second with CD4- T cells (which are  
71 mainly CD8+ T cells); both CD4+ and CD4- T cells fractions were used to evaluate  
72 multimeric complexes of KLRG1.

### 73 **Western Blot**

74 CD4+ and CD4- T cells were lysed, and suspended in Laemmli buffer. SDS-PAGE  
75 under non-reducing conditions was performed, and proteins were transferred to a  
76 0.2 µm-pore-size polyvinylidene difluoride (PDFV) membrane (Biorad, Hercules,  
77 CA, USA). Western blot was performed using the following antibodies anti-: KLRG1  
78 (dilution 1:2000), Glyceraldehyde 3-phosphate dehydrogenase (GAPDH, dilution  
79 1:1000), Mouse- and Rabbit-IgG horseradish peroxidase-labeled (both used  
80 1:2000) (R&D Systems, Minneapolis, MN, USA). Protein bands were detected by

81 incubation with enhanced chemiluminescence reagent (Thermo Scientific, Pierce  
82 Biotech., Rockford, IL), and visualised with the Imaging System from Bio-Rad  
83 (ChemiDoc™ XRS+System). Band densities were analysed by densitometry using  
84 online IMAGEJ 1.39c software provided by NIH. Each sample was normalized  
85 using GAPDH as a loading control. More information of the antibodies used is  
86 indicated in **figure S1**.

### 87 **Polyclonal stimulation of T cells**

88 Total T cells were cultured at  $2 \times 10^5$  cells/well in 96-well plates (Costar, Ontario,  
89 Canada). Polyclonal stimulation was induced with mAbs anti-CD3 (fixed in plate)  
90 and CD28 (soluble), both mAbs at  $1 \mu\text{g/ml}$ ; and with phorbol myristate acetate  
91 (PMA)  $50 \text{ nM}$ – ionomycin (IO)  $2 \text{ ng}/\mu\text{L}$  (both provided by Sigma Aldrich, USA),  
92 during 48 h at  $37^\circ\text{C}$  in a humidified atmosphere containing 5%  $\text{CO}_2$ . As negative  
93 controls, T cells in media or with isotype control ( $1 \mu\text{g/mL}$ ) were included.  
94 Supernatants were collected for cytokine measurements, and cells for proliferation  
95 assay using KI-67 (Biolegend, San Jose, CA, USA) (**figure S3C**). More information  
96 of antibodies used is indicated in **figure S1**.

97 In order to evaluate the activation and proliferation of T cells by flow cytometry,  
98 cells were harvested and washed, and then surface molecules (CD4, CD8 and  
99 CD25) were stained as described above. Cell pellet was suspended in  
100 fixation/permeabilization solution (eBioscience, Beverly, MA, USA) at  $4^\circ\text{C}$ , washed  
101 with permeabilization buffer (eBioscience), and then stained with KI-67 for 30 min  
102 at  $4^\circ\text{C}$  and analysed by flow cytometry (**figure S3C**). Flow cytometry was  
103 performed using a FACS Aria II flow cytometer (Becton Dickinson, San Jose, CA,  
104 USA). The side scatter/forward gating strategy was used to exclude dead cells and  
105 fluorescence minus one (FMO) controls were employed to set the gates.  
106 Frequencies of CD25+ and Ki-67+ T cells from the younger group were normalized  
107 as the 100%. Culture supernatant was stored to evaluate cytokines and  
108 chemokines levels by ELISA or multiplex cytokine assay.

### 109 **ELISA determinations in culture supernatants and plasma samples**

110 The culture supernatant from T cells and plasma from the three study groups were  
111 stored at -80°C until use. Following the manufacturer recommendations, we used  
112 the standard sandwich ELISA for the cytokine IFN- $\gamma$  (Cat. 430104), IL-2 (Cat.  
113 431804), IL-6 (Cat. 430504) and IL-10 (Cat. 430604), provided by Biolegend, and  
114 for the proteins E-Cadherin (Cat. DY648) and Granzyme B (Cat. DY2906-05)  
115 provided by R&D Systems.

116 Multiple cytokine assay in supernatant samples

117 A Bio-Plex Pro Human cytokine 48-Plex Screening Panel (Cat. 12007283, Bio-Rad  
118 Labs, Hercules, CA, USA) was used following the manufacturer's instructions. The  
119 data were acquired by means of a Bio-Plex 200 System and analysed using Bio-  
120 Plex Manager 6.1 software.

121

122 **Supplementary figures**

| Anti-        | Conjugate to         | Use to                | Reference number | Company        |
|--------------|----------------------|-----------------------|------------------|----------------|
| CD3          | PE/Cy7               | Flow cytometry        | 317334           | BioLegend      |
| CD3          | Pacific Blue         | Flow cytometry        | 300330           | BioLegend      |
| CD8a         | PerCP/Cy5.5          | Flow cytometry        | 300924           | BioLegend      |
| CD8a         | APC                  | Flow cytometry        | 344722           | BioLegend      |
| CD4          | Brilliant Violet 510 | Flow cytometry        | 35742            | BioLegend      |
| CD197 (CCR7) | PE                   | Flow cytometry        | 353204           | BioLegend      |
| CD45RA       | FITC                 | Flow cytometry        | 304106           | BioLegend      |
| CD57         | PE/Cy7               | Flow cytometry        | 359624           | BioLegend      |
| CD27         | PerCP/Cy5.5          | Flow cytometry        | 356408           | BioLegend      |
| KLRG1        | APC/Cy7              | Flow cytometry        | 138426           | BioLegend      |
| CD28         | APC                  | Flow cytometry        | 302912           | BioLegend      |
| CD25         | Brilliant Violet 421 | Flow cytometry        | 302630           | BioLegend      |
| CD279 (PD1)  | Pacific Blue         | Flow cytometry        | 329916           | BioLegend      |
| KI-67        | Pacific Blue         | Flow cytometry        | 350512           | BioLegend      |
| KLRG1        | None                 | Western blot          | MAB70291         | R&D Systems    |
| GAPDH        | None                 | Western blot          | 5174S            | Cell signaling |
| Rabbit IgG   | HRP                  | Western blot          | HAF008           | R&D Systems    |
| Mouse IgG    | HRP                  | Western blot          | HAF007           | R&D Systems    |
| CD3          | Purified             | Activation of T cells | 317315           | BioLegend      |
| CD28         | Purified             | Activation of T cells | 302934           | BioLegend      |
| Mouse IgG1   | Purified             | Isotype control       | 553447           | BD Pharmingen  |
| Mouse IgG2a  | Purified             | Isotype control       | 554645           | BD Pharmingen  |

## Supplementary 1

123

124 **Figure S1.** Information of the monoclonal antibodies used in this study.

125

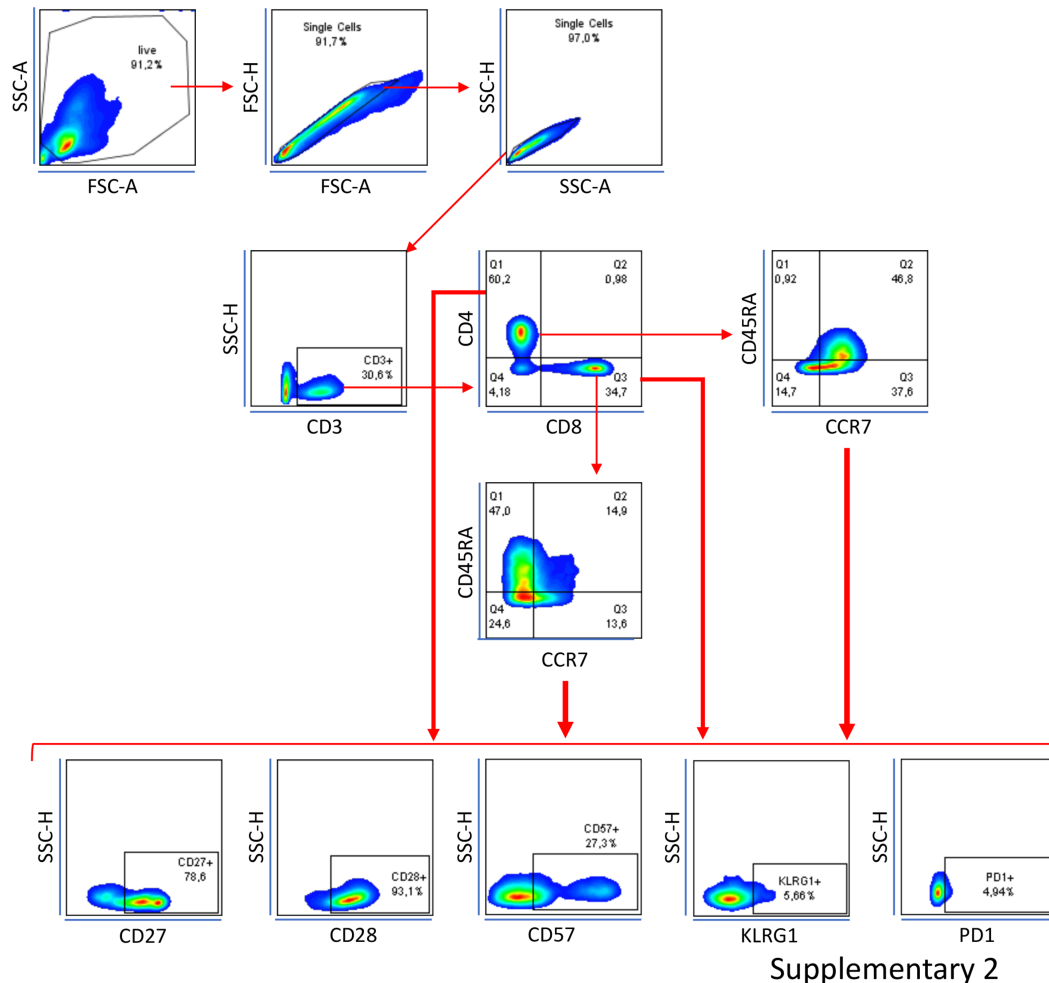

126

127 **Figure S2. Representative analysis of peripheral blood mononuclear cells**  
 128 **(PBMC) by flow cytometry.** Single cells were identified using forward scatter  
 129 (FSC) and side scatter (SSC), first was limited FSC-H/FSC-A and then SSC-  
 130 H/SSC-A. Next, from gate of CD3+ cells, CD4+ and CD8+ cells were evaluated.  
 131 Inside gate CD3+CD4+ and CD3+CD8+ the expression of CD45RA and CCR7  
 132 was used to report the Naïve (CD45RA+/CCR7+), central memory (TCM,  
 133 CD45RA-/CCR7+), effector memory (TEM, CD45RA-/CCR7-), and effector  
 134 memory RA (TEMRA, CD45RA+/CCR7-) cells. In a second analysis performed  
 135 inside gate CD3+CD4+ and CD3+CD8+, the expression of CD27, CD28, CD57,  
 136 KLRG1 and PD1 was examined as percentage and fluorescence mean intensity.  
 137 Representative figure of one patient.

138

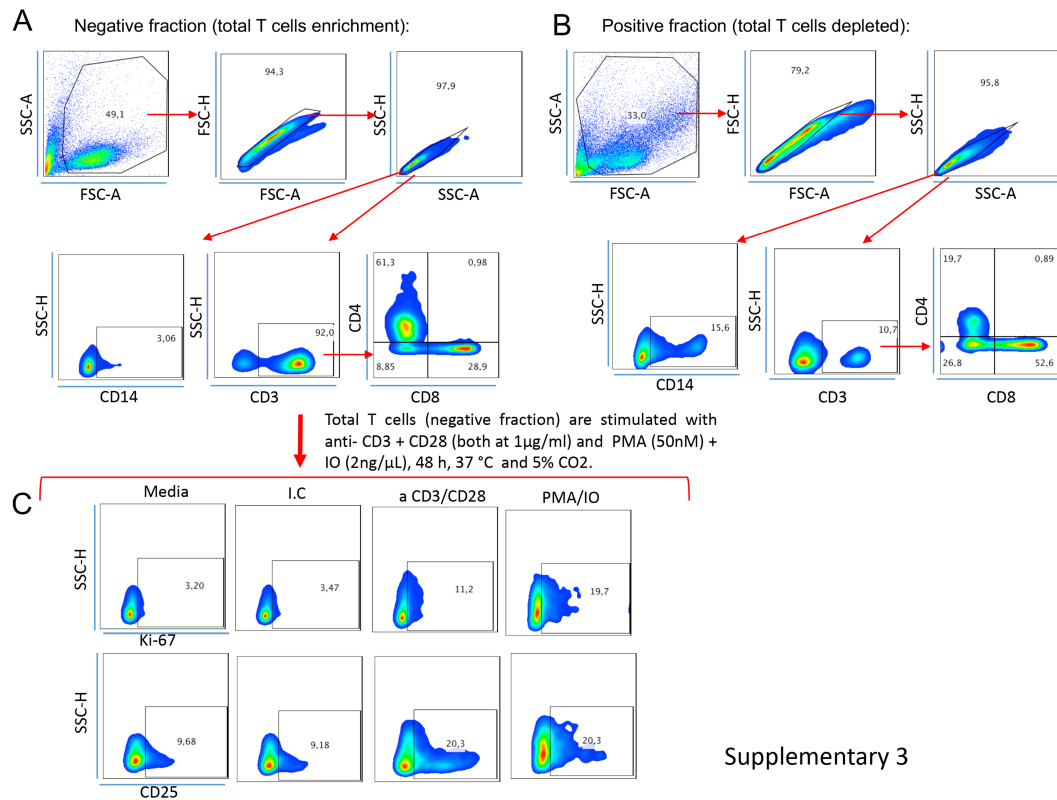

139

140 **Figure S3. Evaluation of the total T cells enrichment and proliferation**  
 141 **analysis.** Peripheral mononuclear cells were obtained, and then total T cells were  
 142 obtained by negative selection using a MACS system. Purity was >90% and a  
 143 <5% of other cells such as CD14<sup>+</sup> cells were present in the negative fraction  
 144 (panel A). As control, the positive fraction (CD3<sup>+</sup> cells depleted) was also  
 145 evaluated by flow cytometry (panel B). Total T cells enrichment was cultured 48  
 146 hours using either monoclonal antibodies anti-CD3 and CD28 (both at 1µg/ml) or  
 147 phorbol myristate acetate (PMA) 50nM– ionomycin (IO) 2ng/µL, as negative  
 148 controls, T cells in media or with isotype control (1µg/mL) were included.  
 149 Posteriorly, T cells were recovered and prepared to flow cytometry using adequate  
 150 controls, first a gate of CD3<sup>+</sup>CD4<sup>+</sup> cells were delimited and then the expression of  
 151 CD25 (to activation) and Ki-67 (to proliferation) was evaluated (panel C).  
 152 Representative figure of one patient.

Supplementary 3



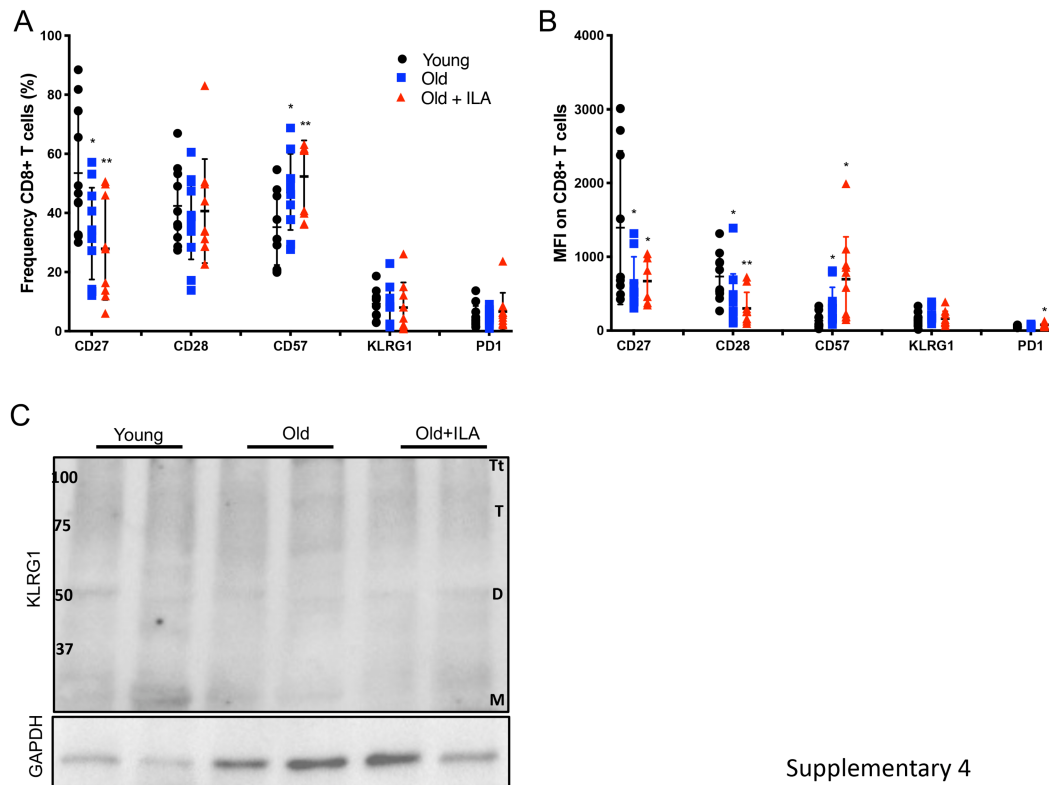

Supplementary 4

153

154

155 **Figure S4. CD8+ T cells from individuals with interstitial lung abnormalities**  
 156 **(ILA) loss CD27 and gain CD57 expression similar to the older control group.**  
 157 Peripheral mononuclear cells were prepared for flow cytometry and western blot.  
 158 First, live cells were identified, the gate of CD3+CD8+ was delimited, and then the  
 159 expression of CD27, CD28, CD57, KLRG1 and PD1 was evaluated both in  
 160 percentage and mean fluorescence intensity (MFI) (panel A and B, respectively).  
 161 (panel C) Total T cells were obtained using a Pan T kit, and then enrichment of  
 162 CD4+ T cells was performed. In the fraction of CD4- T cells the KLRG1 expression  
 163 was evaluated by western blot under non-reducing condition, due KLRG1 is  
 164 absent, the densitometry analysis was not performed. To flow cytometry analysis,  
 165 graphs show individual value mean  $\pm$  SD: Young: n=12, Old: n=13, Old+ILA: n=10,  
 166 and to western blot: n=2 per group. \*p<0.05 \*\*p<0.01. Asterisk means compared to

167 young controls. Multiple T-test correction for multiple comparisons was performed  
 168 using the Holm-Sidak method.

169

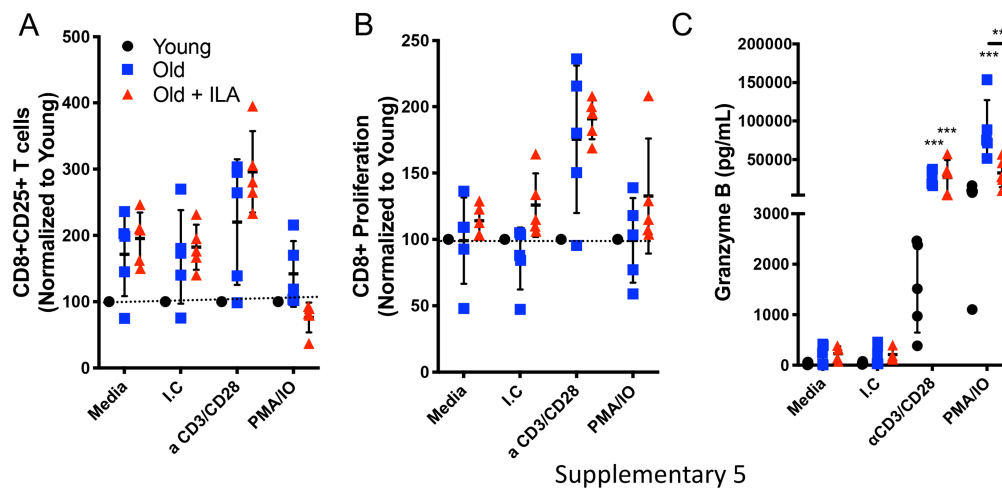

170

171 **Figure S5. CD8+ T cells from individuals with interstitial lung abnormalities**  
 172 **(ILA) show similar proliferative ability compared to old group, but produce**  
 173 **less Granzyme B.** After enrichment T cells were cultured 48 hours with polyclonal  
 174 stimuli using either monoclonal antibodies anti- CD3 and CD28 (both at 1 $\mu$ g/ml) or  
 175 phorbol myristate acetate (PMA) 50nM– ionomycin (IO) 2ng/ $\mu$ L. Cells were  
 176 recovered and prepared to flow cytometry; culture supernatant was used to  
 177 Granzyme B by ELISA. By flow cytometry, CD3+CD8+ cells were delimited and the  
 178 expression of CD25 (to activation) and Ki-67 (to proliferation) was evaluated (panel  
 179 A and B, respectively); the level of activation and proliferation displayed by CD8+ T  
 180 cells from the young group was considered as 100% (black dot line. (panel C)  
 181 Granzyme B released by stimulated T cells was measured by ELISA in the culture'  
 182 supernatant. Graphs show individual value mean  $\pm$  SD (n=5 per group). Asterisks  
 183 indicate comparison of the three groups. When the asterisk is on a line, indicates,  
 184 the comparison between old control group and old+ILA. \*p<0.05 \*\*p<0.01, One-  
 185 Way ANOVA test and Dunnett as post hoc analysis.

186

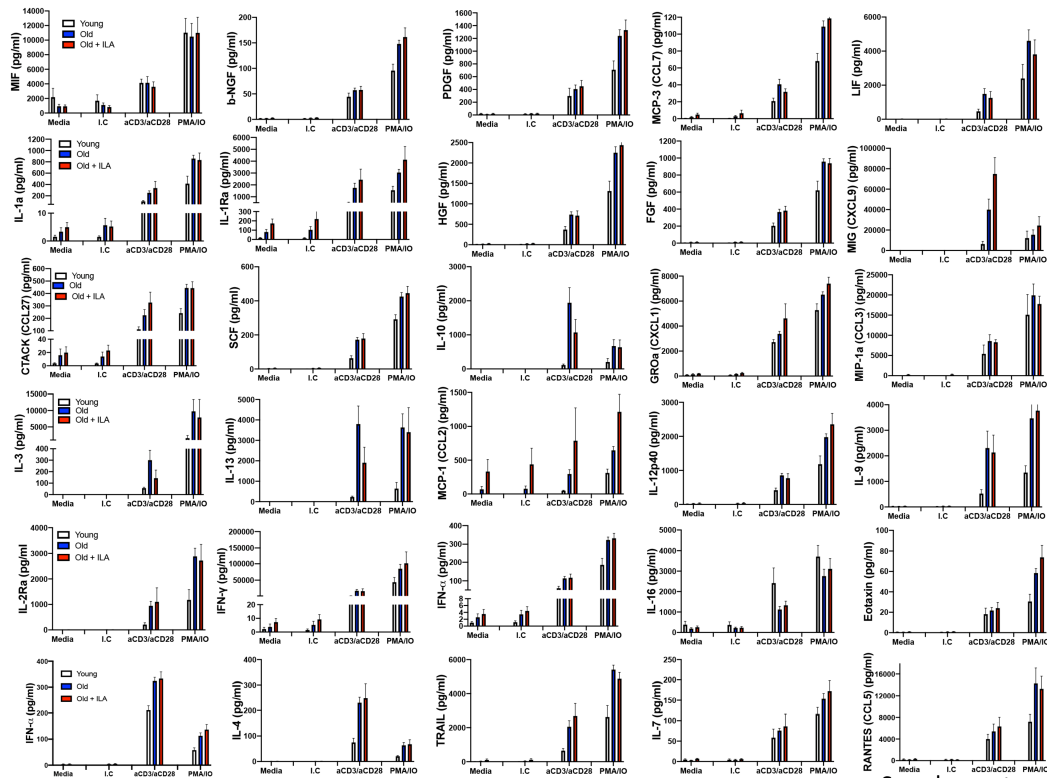

187

Supplementary 6

188 **Figure S6. Under polyclonal stimuli the T cells from persons with interstitial**  
 189 **lung abnormalities (ILA) secrete this group of soluble proteins similar to old**  
 190 **control group.** Enriched T cells were cultured 48 hours with polyclonal stimuli  
 191 either with monoclonal antibodies anti- CD3 and CD28 (both at 1µg/ml) or phorbol  
 192 myristate acetate (PMA) 50nM– ionomycin (IO) 2ng/µL; culture medium (Media)  
 193 and isotype control (I.C) to monoclonal antibodies were used as negative controls.  
 194 Culture supernatant was used to evaluate a panel of 48 soluble molecules by  
 195 Multiplex. We did not observed differences in the profile of 30 soluble proteins  
 196 evaluated between ILA and old control group.

197
